# Supplementary material
Source: PubMed Central journal article supplement (PMC4559523)
Supplement: CJN.12371214_CJN12371214SupplementaryData.pdf [file CJN.12371214_CJN12371214SupplementaryData.pdf]

Appendix 1. Treatment algorithm.

| <b>Tolerance Parameter</b>                                              | <b>Current Dose</b>                                                                            | <b>Action</b>                                                                                                                   |
|-------------------------------------------------------------------------|------------------------------------------------------------------------------------------------|---------------------------------------------------------------------------------------------------------------------------------|
| <b>≤6 mEq/L</b>                                                         | Study medication on hold<br>1 tablet 3 times per week<br>1 tablet per day<br>2 tablets per day | Start 1 tablet 3 times per week<br>Increase to 1 tablet per day<br>Increase to 2 tablets per day<br>Continue 2 tablets per day  |
| <b>6.1 to 6.5 mEq/L<br/>or clinically<br/>important<br/>hypotension</b> | Study medication on hold<br>1 tablet 3 times per week<br>1 tablet per day<br>2 tablets per day | Continue to hold study medication<br>Hold study medication<br>Reduce to 1 tablet 3 times per week<br>Reduce to 1 tablet per day |
| <b>&gt;6.5 mEq/L</b>                                                    | Any dose                                                                                       | Hold study medication                                                                                                           |

## Appendix 2. Outcome definitions.

### *Discontinuation for hyperkalemia or hypotension*

Patients will be considered to have discontinued the study medication for hyperkalemia or clinically significant hypotension if the patient, investigator or clinical care provider decides that the study medication must be permanently stopped due to high serum potassium concentrations, low blood pressures or symptoms of low blood pressure.

### *Permanent Discontinuation*

Patients will be considered to have permanently discontinued the study medication if it is stopped for any reason without the intent to reintroduce the medication before the end of the trial.

### *Adherence with Study Treatment*

Patients will be considered adherent if, on self-report, they state they have taken at least 80% of the study medication (i.e. 80% of all prescribed study tablets) at every visit.

### *Hospitalization for Vascular Reasons*

Hospitalization for vascular reasons is defined as hospitalization for MI, cardiac arrest, stroke, congestive heart failure, ischemic symptoms with ST or T wave changes on an ECG, cardiac arrhythmia, cardiac revascularization procedure, or any vascular surgery including amputation (see below for individual definitions).

### *Myocardial infarction*

The diagnosis of MI requires any one of the following criterion:

1. A typical rise of troponin or a typical fall of an elevated troponin in a patient without a documented alternative explanation for an elevated troponin (e.g., pulmonary embolism). This criterion also requires that 1 of the following must also exist:
  - A. ischemic signs or symptoms (i.e., chest, arm, neck, or jaw discomfort; shortness of breath, pulmonary edema)
  - B. development of pathologic Q waves present in any two contiguous leads that are  $\geq 30$  milliseconds
  - C. ECG changes indicative of ischemia (i.e., ST segment elevation [ $\geq 2$  mm in leads V<sub>1</sub>, V<sub>2</sub>, or V<sub>3</sub> OR  $\geq 1$  mm in the other leads], ST segment depression [ $\geq 1$  mm], or symmetric inversion of T waves  $\geq 1$  mm) in at least two contiguous leads
  - D. coronary artery intervention (i.e., PCI or CABG surgery)
  - E. new or presumed new cardiac wall motion abnormality on echocardiography or new or presumed new fixed defect on radionuclide imaging

2. Pathologic findings of an acute or healing myocardial infarction
3. Development of new pathological Q waves on an ECG if troponin levels were not obtained or were obtained at times that could have missed the clinical event

### ***Nonfatal cardiac arrest***

Nonfatal cardiac arrest is defined as successful resuscitation from either documented or presumed ventricular fibrillation, sustained ventricular tachycardia, asystole, or pulseless electrical activity requiring cardiopulmonary resuscitation, pharmacological therapy, or cardiac defibrillation.

### ***Cardiac Revascularization Procedures***

Cardiac revascularization procedures include PCI and CABG surgery.

### ***Stroke***

Stroke is defined as a new focal neurological deficit thought to be vascular in origin with signs or symptoms lasting more than 24 hours or leading to death.

### ***Clinically important hypotension***

Clinically important hypotension is defined as a systolic blood pressure <90 mm Hg requiring fluid resuscitation, a reduction in antihypertensive medications, or an increase in post-dialysis target weight.

### ***Congestive heart failure***

The definition of congestive heart failure requires at least one of the following clinical signs (i.e. any of the following signs: elevated jugular venous pressure, respiratory rales/crackles, crepitations, or presence of S3) and at least one of the following radiographic findings (i.e., vascular redistribution, interstitial pulmonary edema, or frank alveolar pulmonary edema).

### ***Sub-classification of death***

Outcome assessors will classify all deaths as either vascular or non-vascular. Vascular death is defined as any death with a vascular cause and includes those deaths following a myocardial infarction, cardiac arrest, stroke, cardiac revascularization procedure (i.e., percutaneous coronary intervention [PCI] or coronary artery bypass graft [CABG] surgery), or deaths due to an unknown cause. Non-vascular death is defined as any death due to a clearly documented non-vascular cause (e.g. trauma, infection, malignancy, withdrawal of dialysis).

Appendix 3. Details of dosing by group at each study follow-up.

|                | Placebo |         | Eplerenone |         |
|----------------|---------|---------|------------|---------|
|                | n       | Percent | n          | Percent |
| <b>Week 1</b>  |         |         |            |         |
| 2 tabs/day     | 0       | 0.00%   | 0          | 0.00%   |
| 1 tab/day      | 71      | 92.2%   | 75         | 97.4%   |
| 3 tabs/week    | 0       | 0.00%   | 0          | 0.00%   |
| Off drug       | 6       | 7.79%   | 2          | 2.60%   |
| <b>Week 2</b>  |         |         |            |         |
| 2 tabs/day     | 50      | 64.9%   | 54         | 70.1%   |
| 1 tab/day      | 9       | 11.7%   | 4          | 5.19%   |
| 3 tabs/week    | 12      | 15.6%   | 11         | 14.3%   |
| Off drug       | 6       | 7.79%   | 8          | 10.4%   |
| <b>Week 3</b>  |         |         |            |         |
| 2 tabs/day     | 49      | 63.6%   | 52         | 68.4%   |
| 1 tab/day      | 16      | 20.8%   | 12         | 15.8%   |
| 3 tabs/week    | 1       | 1.30%   | 0          | 0.00%   |
| Off drug       | 11      | 14.3%   | 12         | 15.8%   |
| <b>Week 7</b>  |         |         |            |         |
| 2 tabs/day     | 44      | 57.1%   | 53         | 69.7%   |
| 1 tab/day      | 13      | 16.9%   | 11         | 14.5%   |
| 3 tabs/week    | 5       | 6.49%   | 0          | 0.00%   |
| Off drug       | 15      | 19.5%   | 12         | 15.8%   |
| <b>Week 13</b> |         |         |            |         |
| 2 tabs/day     | 53      | 69.7%   | 49         | 64.5%   |
| 1 tab/day      | 5       | 6.58%   | 9          | 11.8%   |
| 3 tabs/week    | 3       | 3.95%   | 2          | 2.63%   |

|          | Placebo |         | Eplerenone |         |
|----------|---------|---------|------------|---------|
|          | n       | Percent | n          | Percent |
| Off drug | 15      | 19.7%   | 16         | 21.1%   |
